# Supplementary material
Source: MDPI journal article supplement (https://www.mdpi.com/2073-8994/13/8/1467)
Supplement: s1 [file s1 › symmetry-1275855-supplementary.pdf]

Supplementary:

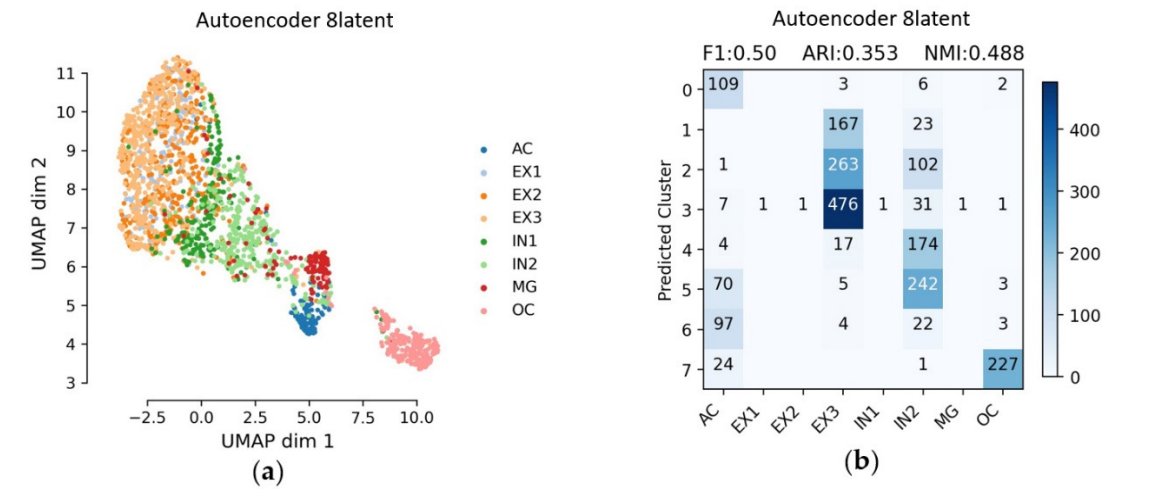

**Figure S1.** Feature embedding and clustering of General autoencoder under different 8 latent space. Clustering accuracy was shown in evaluation matrices between cluster assignments predicted by K-means and the reference cell types. The blue colorbar refers to the number of cells; (a) UMAP visualization of the extracted features from General autoencoder with 8 latent features; (b) Evaluation matrices with 8 latent features.

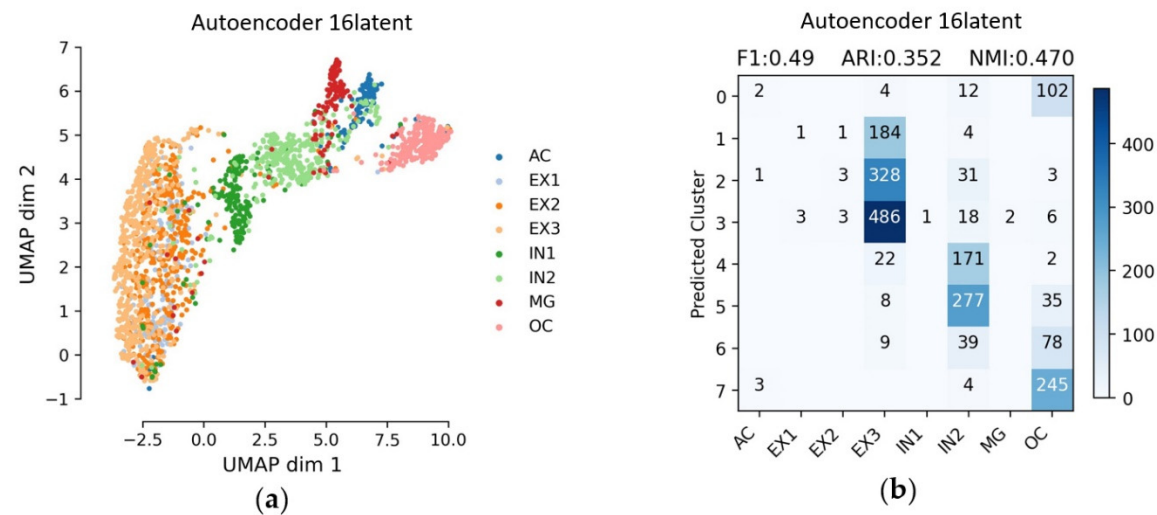

**Figure S2.** Feature embedding and clustering of General autoencoder under different 16 latent space. Clustering accuracy was shown in evaluation matrices between cluster assignments predicted by K-means and the reference cell types. The blue colorbar refers to the number of cells; (a) UMAP visualization of the extracted features from General autoencoder with 16 latent features; (b) Evaluation matrices with 16 latent features.

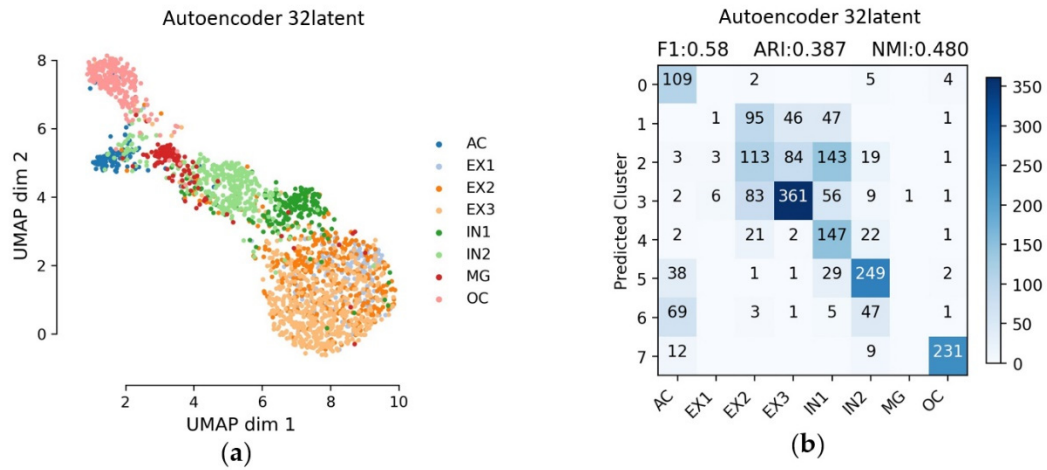

**Figure S3.** Feature embedding and clustering of General autoencoder under different 32 latent space. Clustering accuracy was shown in evaluation matrices between cluster assignments predicted by K-means and the reference cell types. The blue colorbar refers to the number of cells; (a) UMAP visualization of the extracted features from General autoencoder with 32 latent features; (b) Evaluation matrices with 32 latent features.

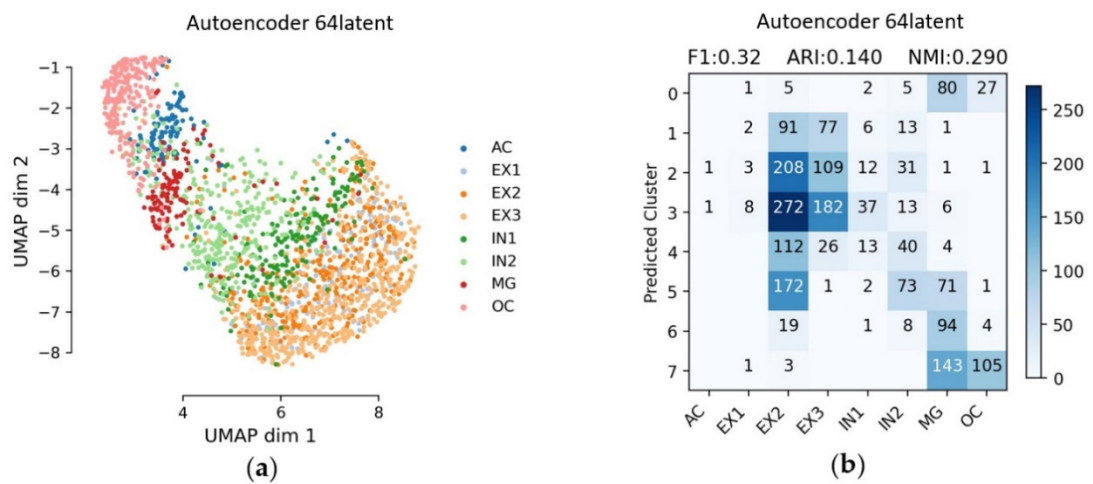

**Figure S4.** Feature embedding and clustering of General autoencoder under different 64 latent space. Clustering accuracy was shown in evaluation matrices between cluster assignments predicted by K-means and the reference cell types. The blue colorbar refers to the number of cells; (a) UMAP visualization of the extracted features from General autoencoder with 64 latent features; (b) Evaluation matrices with 64 latent features.

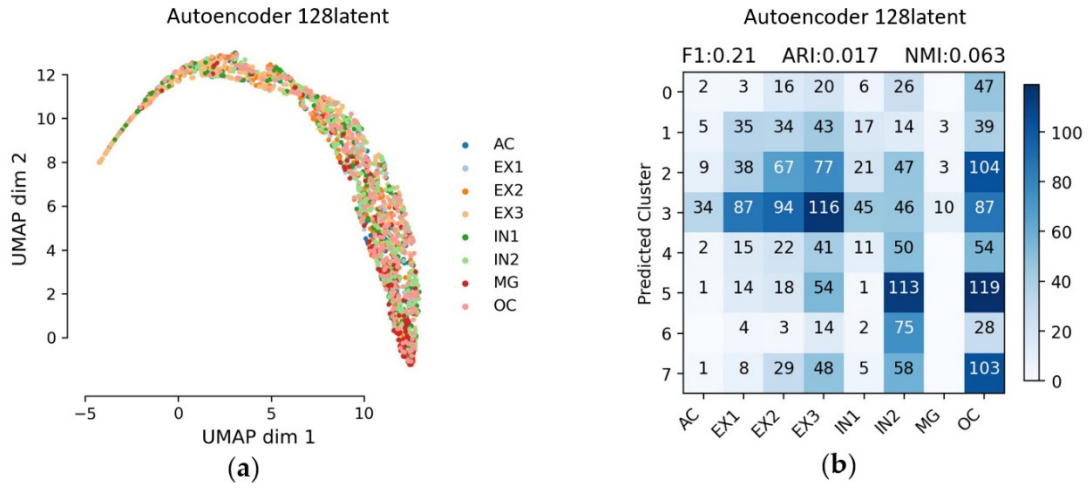

**Figure S5.** Feature embedding and clustering of General autoencoder under different 128 latent space. Clustering accuracy was shown in evaluation matrices between cluster assignments predicted by K-means and the reference cell types. The blue colorbar refers to the number of cells; (a) UMAP visualization of the extracted features from General autoencoder with 128 latent features; (b) Evaluation matrices with 128 latent features.

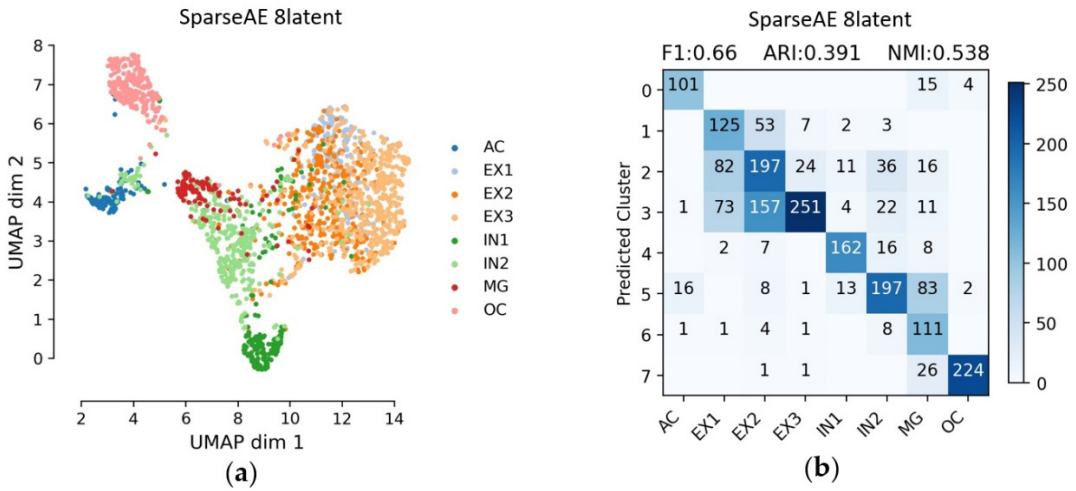

**Figure S6.** Feature embedding and clustering of SparseAE under different 8 latent space. Clustering accuracy was shown in evaluation matrices between cluster assignments predicted by K-means and the reference cell types. The blue colorbar refers to the number of cells; (a) UMAP visualization of the extracted features from SparseAE with 8 latent features; (b) Evaluation matrices with 8 latent features.

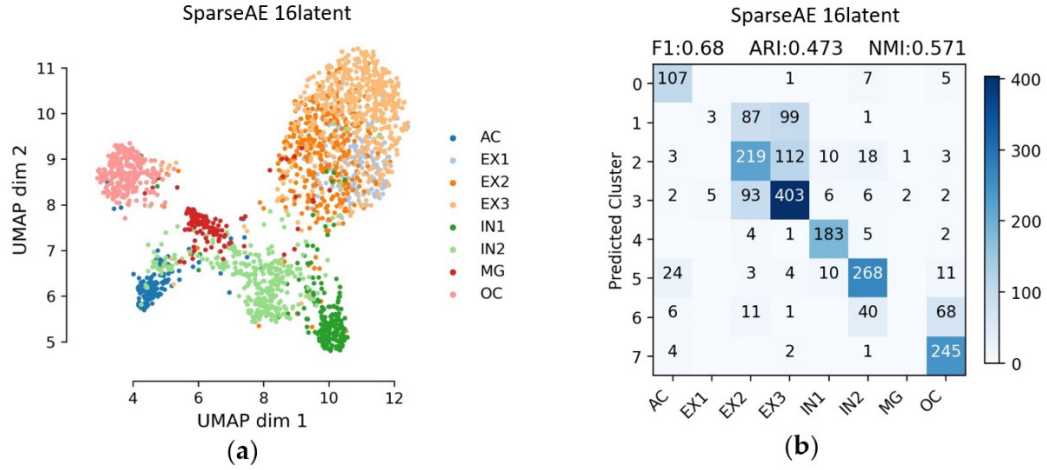

**Figure S7.** Feature embedding and clustering of SparseAE under different 16 latent space. Clustering accuracy was shown in evaluation matrices between cluster assignments predicted by K-means and the reference cell types. The blue colorbar refers to the number of cells; (a) UMAP visualization of the extracted features from SparseAE with 16 latent features; (b) Evaluation matrices with 16 latent features.

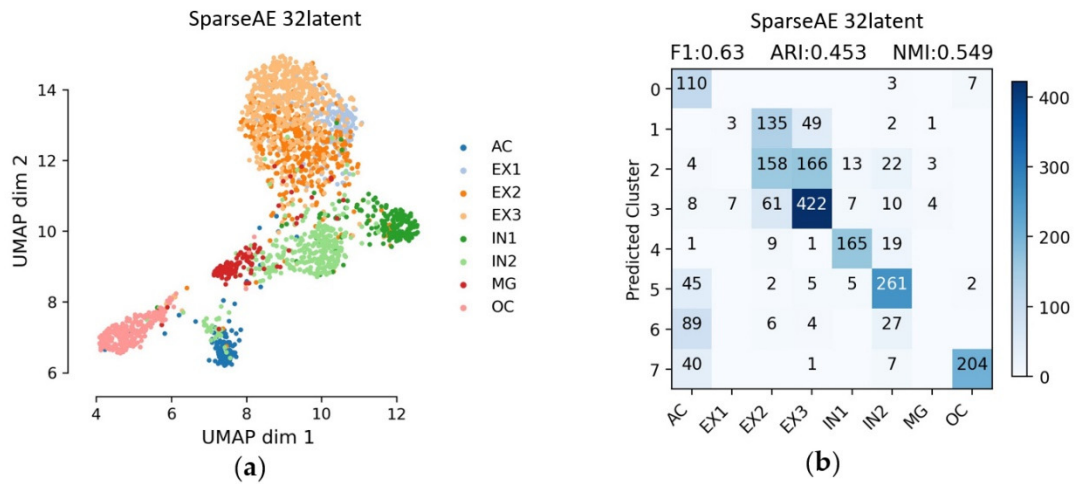

**Figure S8.** Feature embedding and clustering of SparseAE under different 32 latent space. Clustering accuracy was shown in evaluation matrices between cluster assignments predicted by K-means and the reference cell types. The blue colorbar refers to the number of cells; (a) UMAP visualization of the extracted features from SparseAE with 32 latent features; (b) Evaluation matrices with 32 latent features.

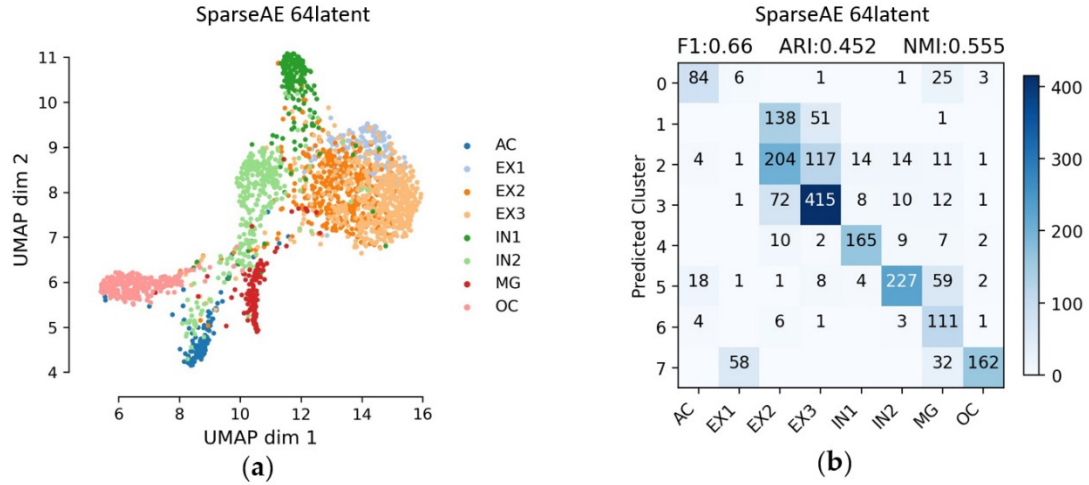

**Figure S9.** Feature embedding and clustering of SparseAE under different 64 latent space. Clustering accuracy was shown in evaluation matrices between cluster assignments predicted by K-means and the reference cell types. The blue colorbar refers to the number of cells; (a) UMAP visualization of the extracted features from SparseAE with 64 latent features; (b) Evaluation matrices with 64 latent features.

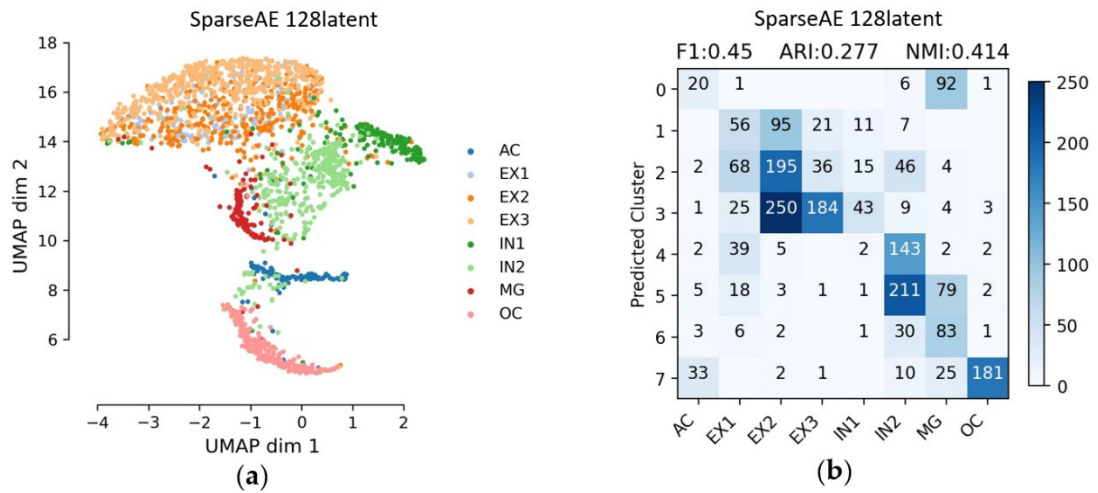

**Figure S10.** Feature embedding and clustering of SparseAE under different 128 latent space. Clustering accuracy was shown in evaluation matrices between cluster assignments predicted by K-means and the reference cell types. The blue colorbar refers to the number of cells; (a) UMAP visualization of the extracted features from SparseAE with 128 latent features; (b) Evaluation matrices with 128 latent features.

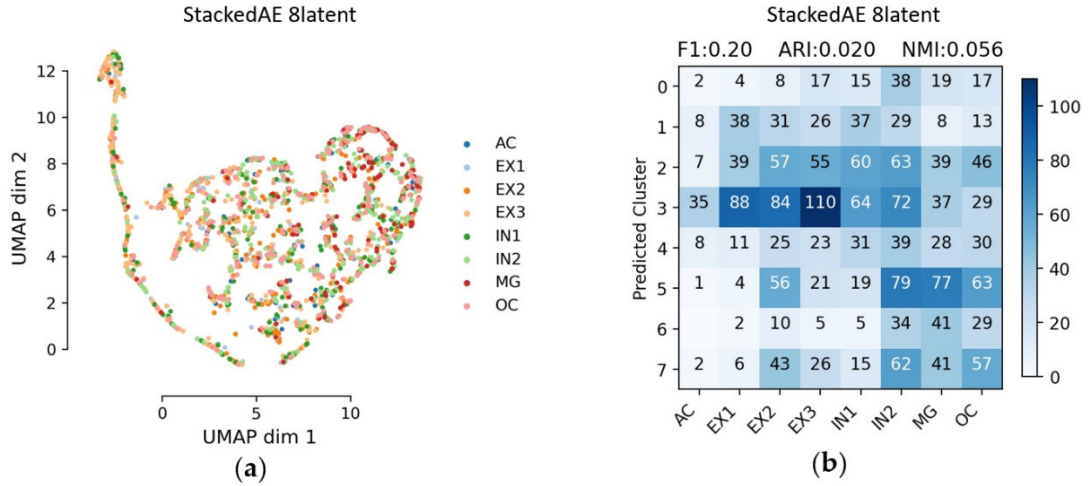

**Figure S11.** Feature embedding and clustering of StackedAE under different 8 latent space. Clustering accuracy was shown in evaluation matrices between cluster assignments predicted by K-means and the reference cell types. The blue colorbar refers to the number of cells; (a) UMAP visualization of the extracted features from StackedAE with 8 latent features; (b) Evaluation matrices with 8 latent features.

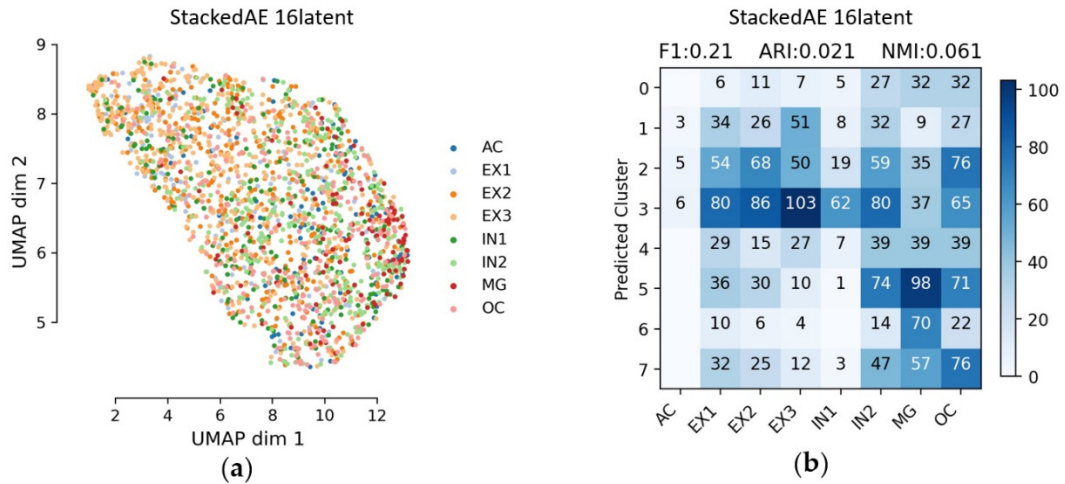

**Figure S12.** Feature embedding and clustering of StackedAE under different 16 latent space. Clustering accuracy was shown in evaluation matrices between cluster assignments predicted by K-means and the reference cell types. The blue colorbar refers to the number of cells; (a) UMAP visualization of the extracted features from StackedAE with 16 latent features; (b) Evaluation matrices with 16 latent features.

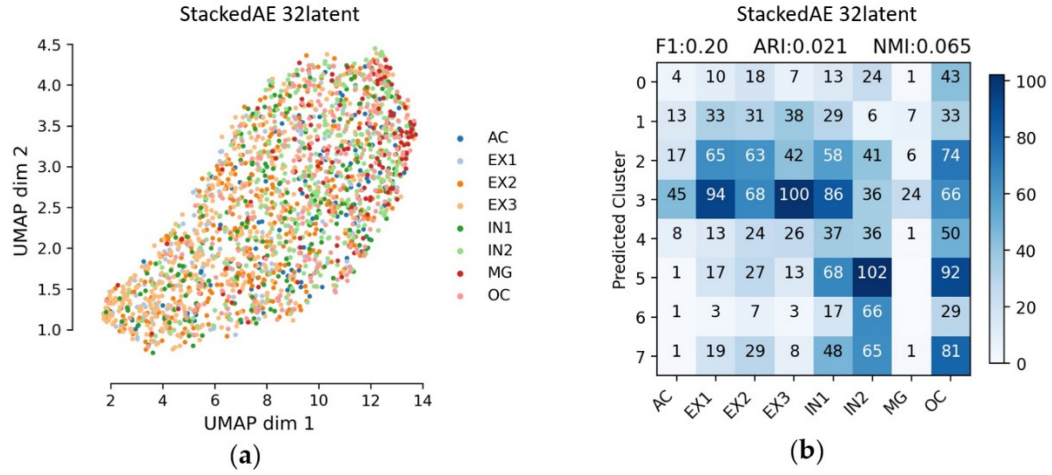

**Figure S13.** Feature embedding and clustering of StackedAE under different 32 latent space. Clustering accuracy was shown in evaluation matrices between cluster assignments predicted by K-means and the reference cell types. The blue colorbar refers to the number of cells; (a) UMAP visualization of the extracted features from StackedAE with 32 latent features; (b) Evaluation matrices with 32 latent features.

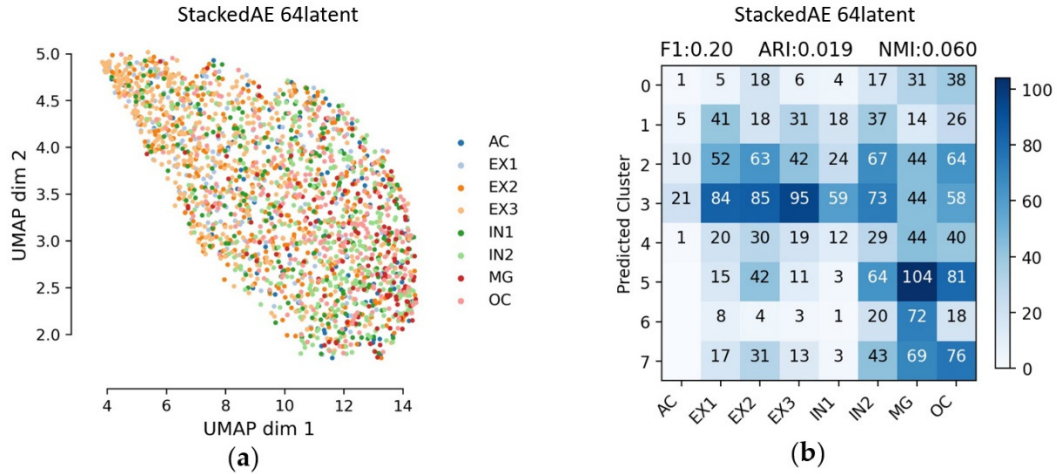

**Figure S14.** Feature embedding and clustering of StackedAE under different 64 latent space. Clustering accuracy was shown in evaluation matrices between cluster assignments predicted by K-means and the reference cell types. The blue colorbar refers to the number of cells; (a) UMAP visualization of the extracted features from StackedAE with 64 latent features; (b) Evaluation matrices with 64 latent features.

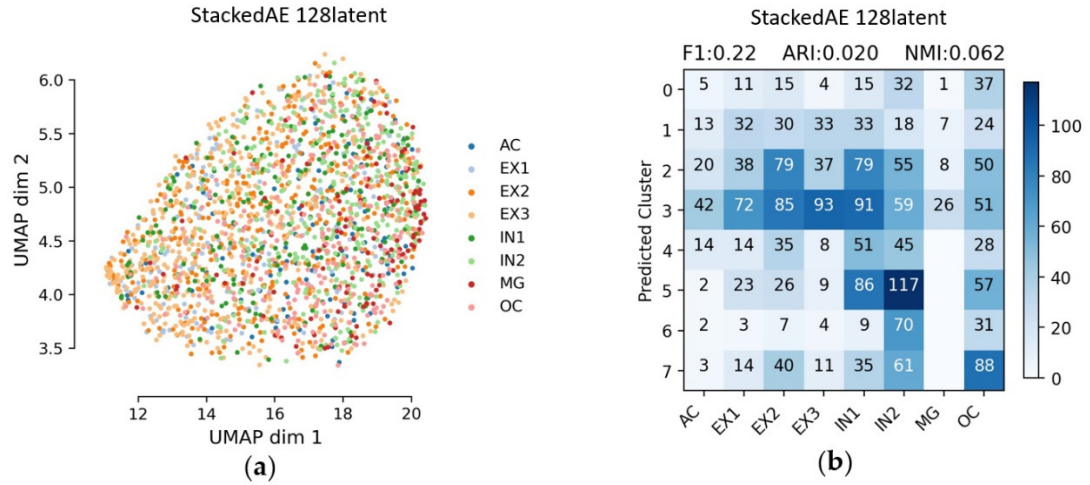

**Figure S15.** Feature embedding and clustering of StackedAE under different 128 latent space. Clustering accuracy was shown in evaluation matrices between cluster assignments predicted by K-means and the reference cell types. The blue colorbar refers to the number of cells; (a) UMAP visualization of the extracted features from StackedAE with 128 latent features; (b) Evaluation matrices with 128 latent features.

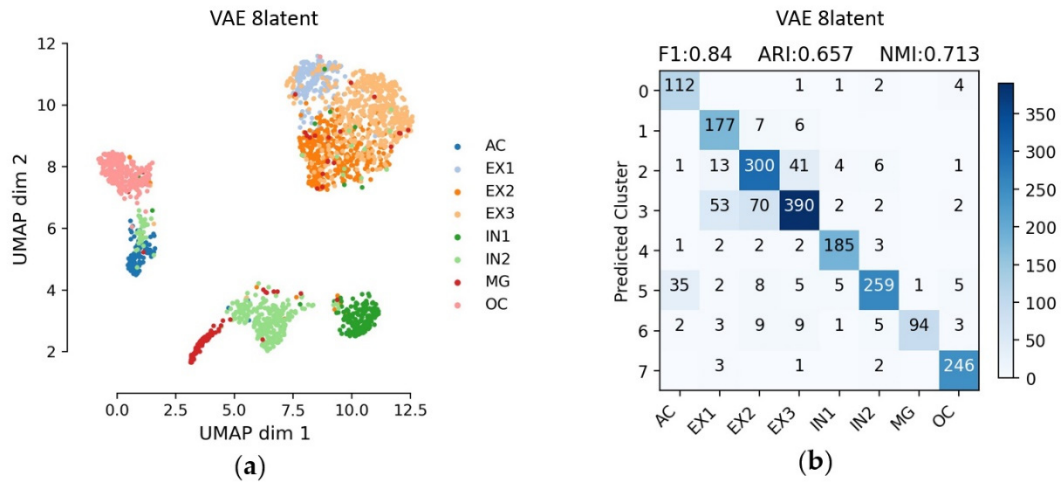

**Figure S16.** Feature embedding and clustering of VAE under different 8 latent space. Clustering accuracy was shown in evaluation matrices between cluster assignments predicted by K-means and the reference cell types. The blue colorbar refers to the number of cells; (a) UMAP visualization of the extracted features from VAE with 8 latent features; (b) Evaluation matrices with 8 latent features.

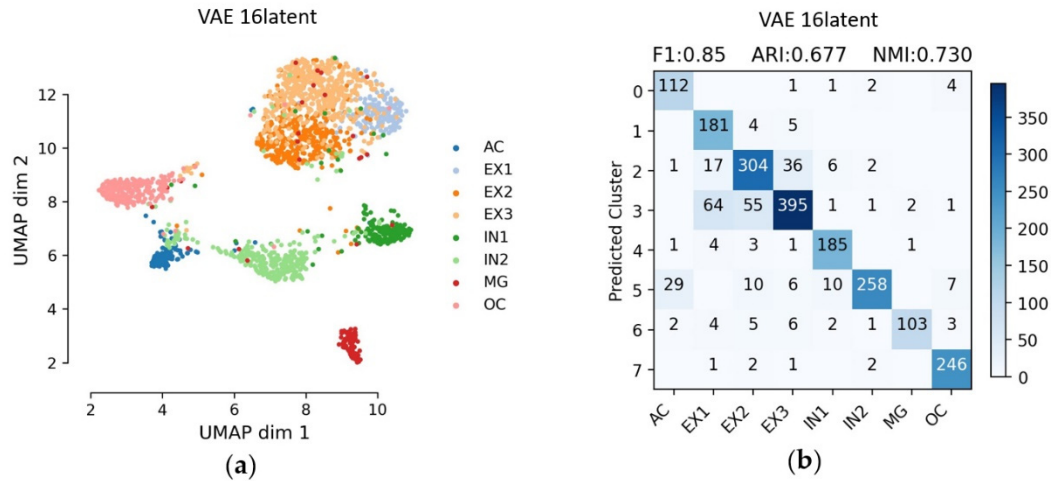

**Figure S17.** Feature embedding and clustering of VAE under different 16 latent space. Clustering accuracy was shown in evaluation matrices between cluster assignments predicted by K-means and the reference cell types. The blue colorbar refers to the number of cells; (a) UMAP visualization of the extracted features from VAE with 16 latent features; (b) Evaluation matrices with 16 latent features.

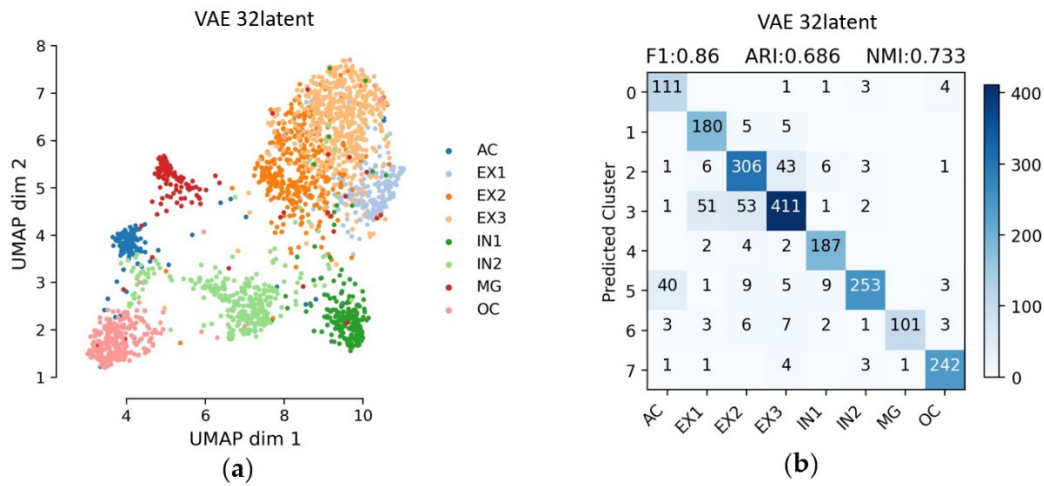

**Figure S18.** Feature embedding and clustering of VAE under different 32 latent space. Clustering accuracy was shown in evaluation matrices between cluster assignments predicted by K-means and the reference cell types. The blue colorbar refers to the number of cells; (a) UMAP visualization of the extracted features from VAE with 32 latent features; (b) Evaluation matrices with 32 latent features.

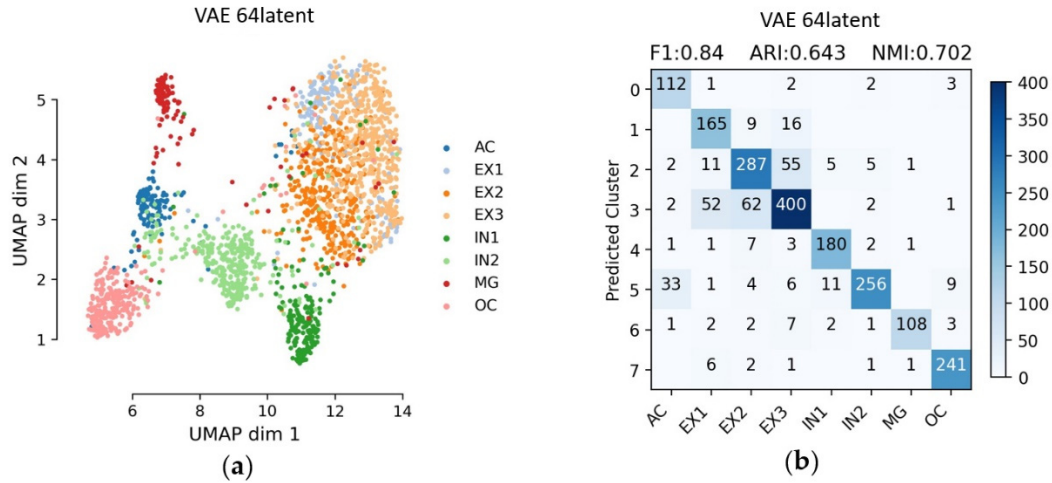

**Figure S19.** Feature embedding and clustering of VAE under different 64 latent space. Clustering accuracy was shown in evaluation matrices between cluster assignments predicted by K-means and the reference cell types. The blue colorbar refers to the number of cells; (a) UMAP visualization of the extracted features from VAE with 64 latent features; (b) Evaluation matrices with 64 latent features.

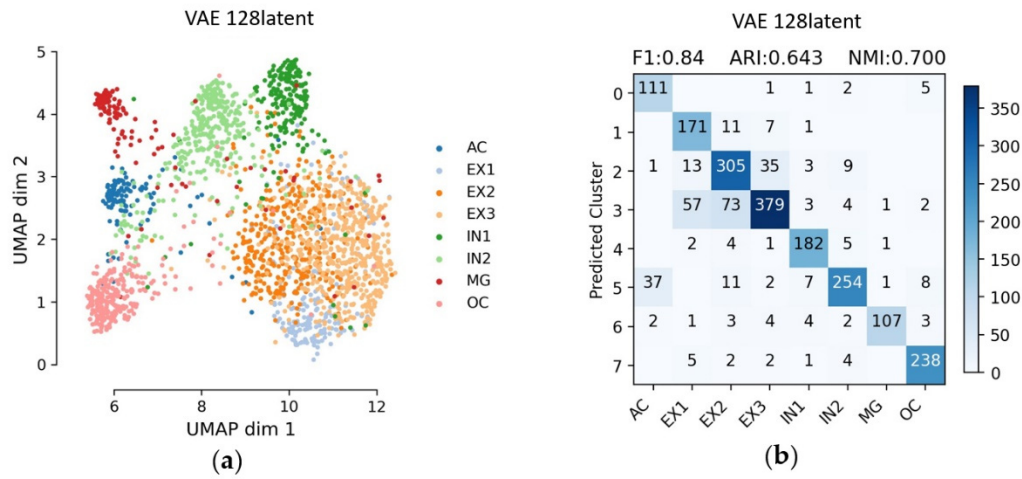

**Figure S20.** Feature embedding and clustering of VAE under different 128 latent space. Clustering accuracy was shown in evaluation matrices between cluster assignments predicted by K-means and the reference cell types. The blue colorbar refers to the number of cells; (a) UMAP visualization of the extracted features from VAE with 128 latent features; (b) Evaluation matrices with 128 latent features.

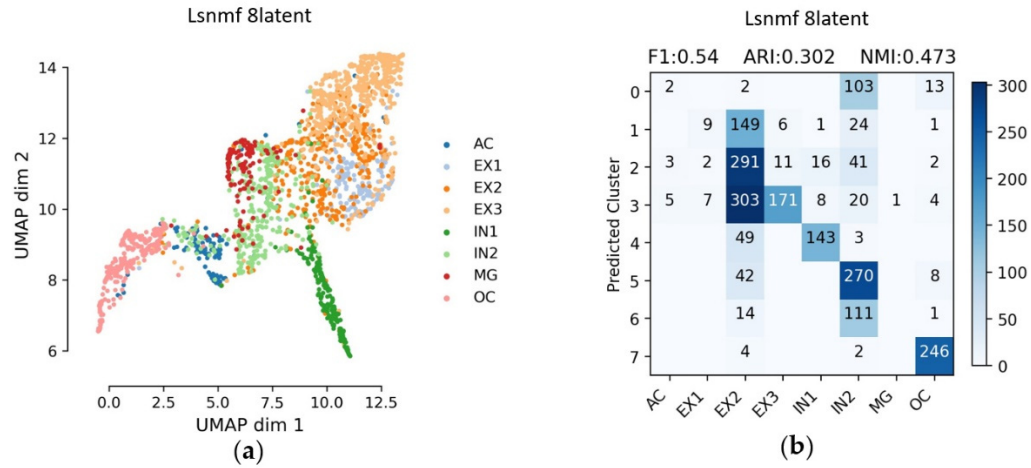

**Figure S21.** Feature embedding and clustering of Lsnmf under different 8 latent space. Clustering accuracy was shown in evaluation matrices between cluster assignments predicted by K-means and the reference cell types. The blue colorbar refers to the number of cells; (a) UMAP visualization of the extracted features from Lsnmf with 8 latent features; (b) Evaluation matrices with 8 latent features.

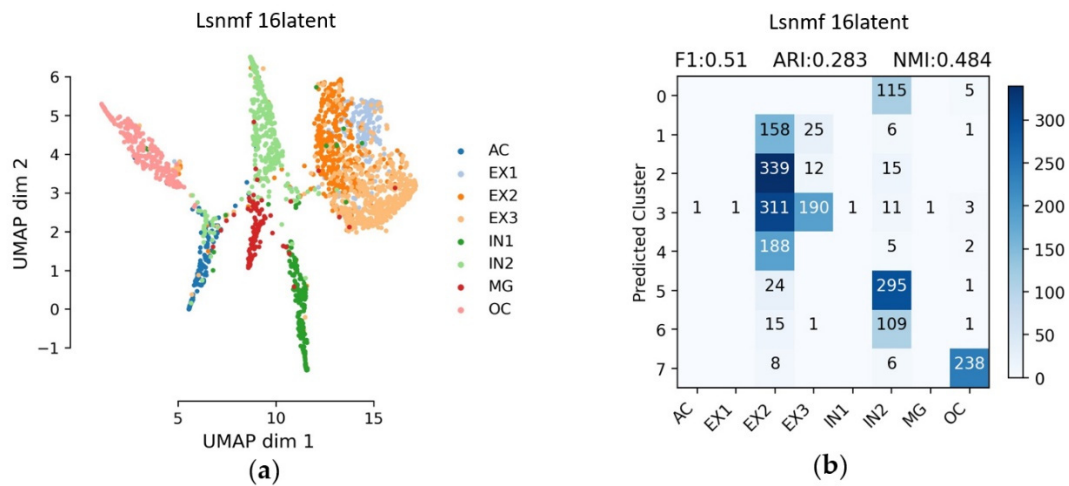

**Figure S22.** Feature embedding and clustering of Lsnmf under different 16 latent space. Clustering accuracy was shown in evaluation matrices between cluster assignments predicted by K-means and the reference cell types. The blue colorbar refers to the number of cells; (a) UMAP visualization of the extracted features from Lsnmf with 16 latent features; (b) Evaluation matrices with 16 latent features.

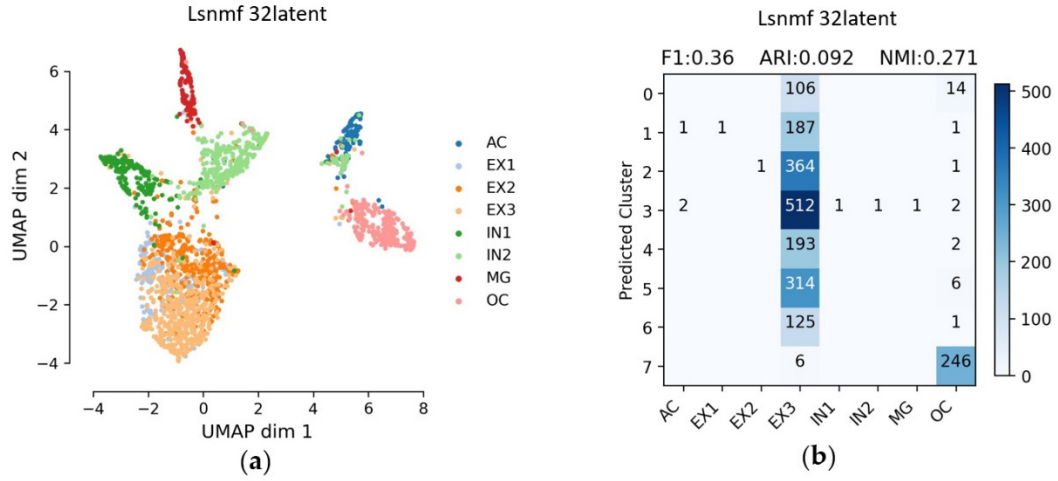

**Figure S23.** Feature embedding and clustering of Lsnmf under different 32 latent space. Clustering accuracy was shown in evaluation matrices between cluster assignments predicted by K-means and the reference cell types. The blue colorbar refers to the number of cells; (a) UMAP visualization of the extracted features from Lsnmf with 32 latent features; (b) Evaluation matrices with 32 latent features.

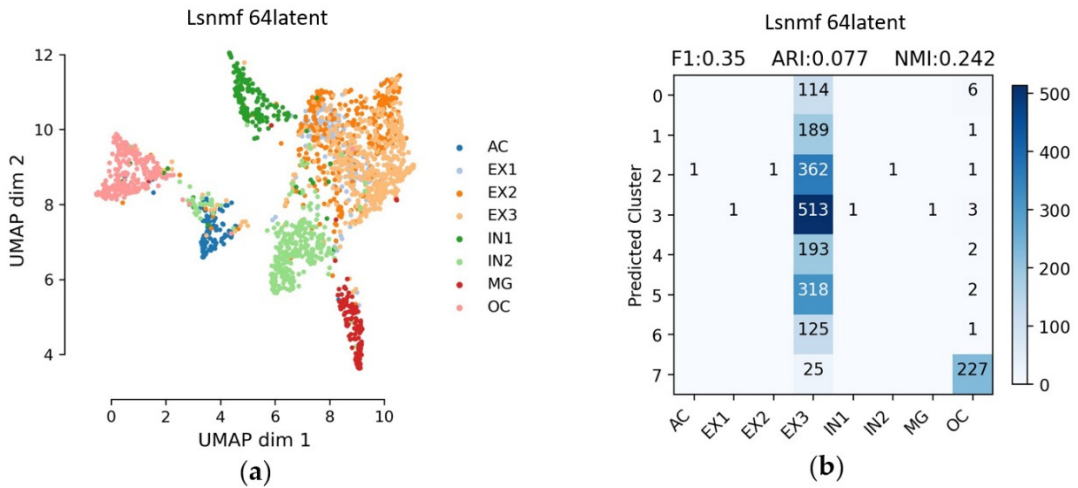

**Figure S24.** Feature embedding and clustering of Lsnmf under different 64 latent space. Clustering accuracy was shown in evaluation matrices between cluster assignments predicted by K-means and the reference cell types. The blue colorbar refers to the number of cells; (a) UMAP visualization of the extracted features from Lsnmf with 64 latent features; (b) Evaluation matrices with 64 latent features.

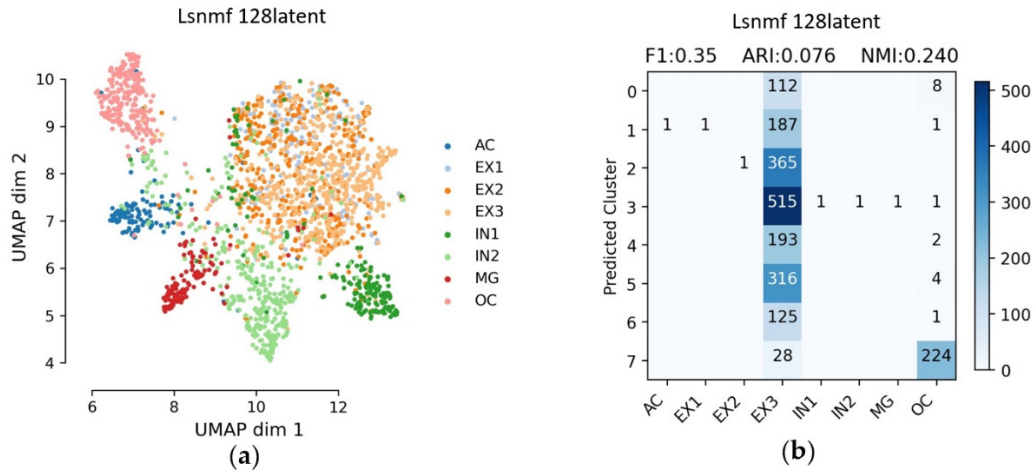

**Figure S25.** Feature embedding and clustering of Lsnmf under different 128 latent space. Clustering accuracy was shown in evaluation matrices between cluster assignments predicted by K-means and the reference cell types. The blue colorbar refers to the number of cells; (a) UMAP visualization of the extracted features from Lsnmf with 128 latent features; (b) Evaluation matrices with 128 latent features.

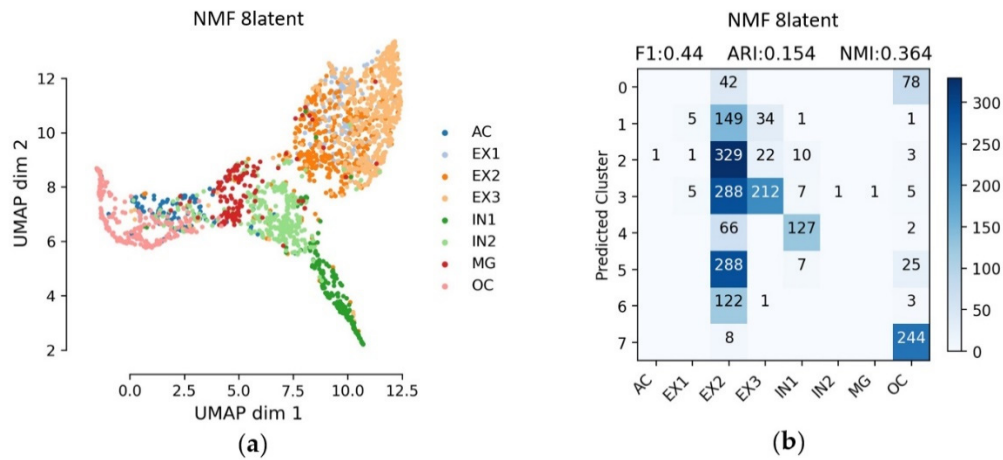

**Figure S26.** Feature embedding and clustering of NMF under different 8 latent space. Clustering accuracy was shown in evaluation matrices between cluster assignments predicted by K-means and the reference cell types. The blue colorbar refers to the number of cells; (a) UMAP visualization of the extracted features from NMF with 8 latent features; (b) Evaluation matrices with 8 latent features.

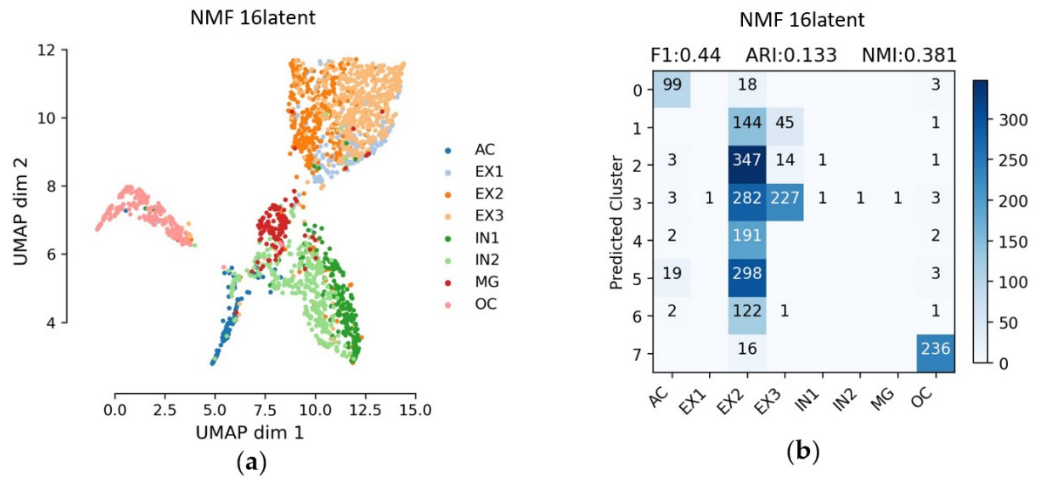

**Figure S27.** Feature embedding and clustering of NMF under different 16 latent space. Clustering accuracy was shown in evaluation matrices between cluster assignments predicted by K-means and the reference cell types. The blue colorbar refers to the number of cells; (a) UMAP visualization of the extracted features from NMF with 16 latent features; (b) Evaluation matrices with 16 latent features.

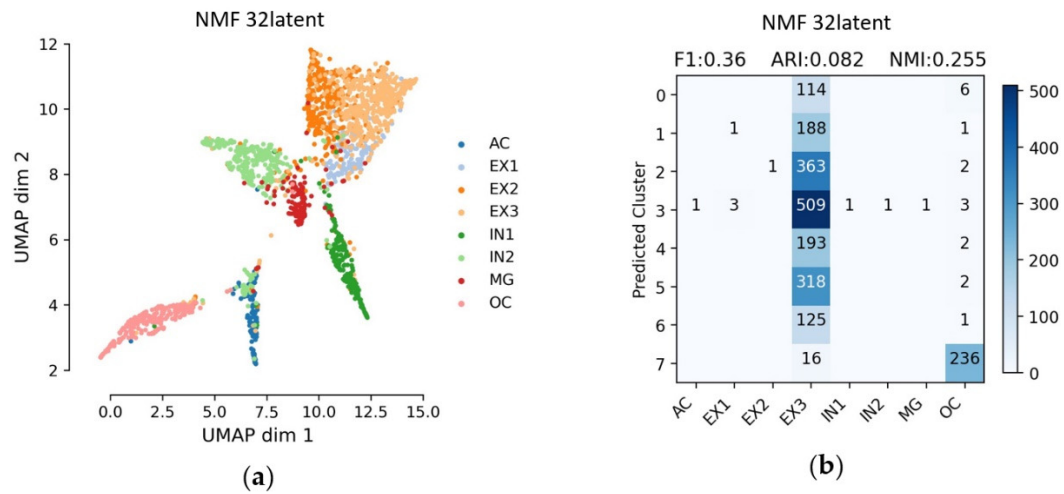

**Figure S28.** Feature embedding and clustering of NMF under different 32 latent space. Clustering accuracy was shown in evaluation matrices between cluster assignments predicted by K-means and the reference cell types. The blue colorbar refers to the number of cells; (a) UMAP visualization of the extracted features from NMF with 32 latent features; (b) Evaluation matrices with 32 latent features.

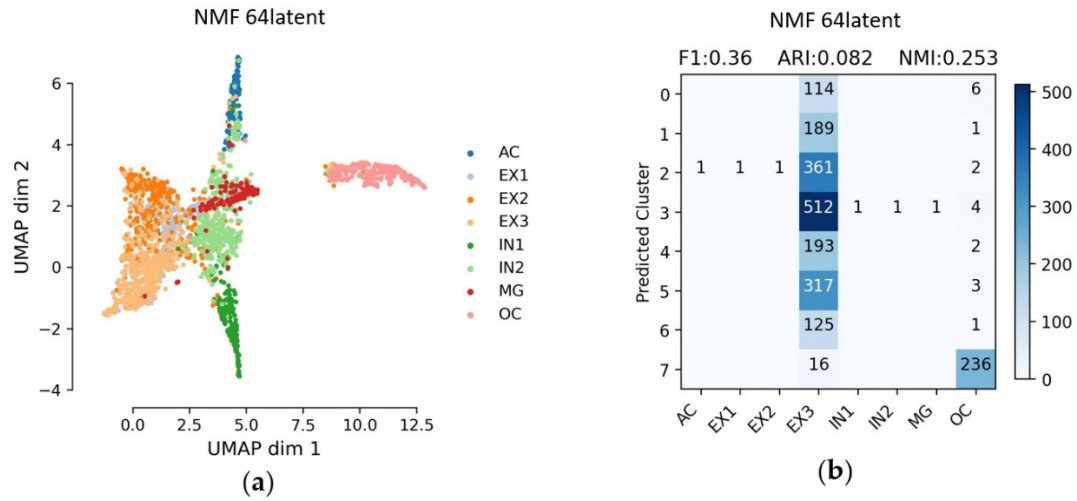

**Figure S29.** Feature embedding and clustering of NMF under different 64 latent space. Clustering accuracy was shown in evaluation matrices between cluster assignments predicted by K-means and the reference cell types. The blue colorbar refers to the number of cells; (a) UMAP visualization of the extracted features from NMF with 64 latent features; (b) Evaluation matrices with 64 latent features.

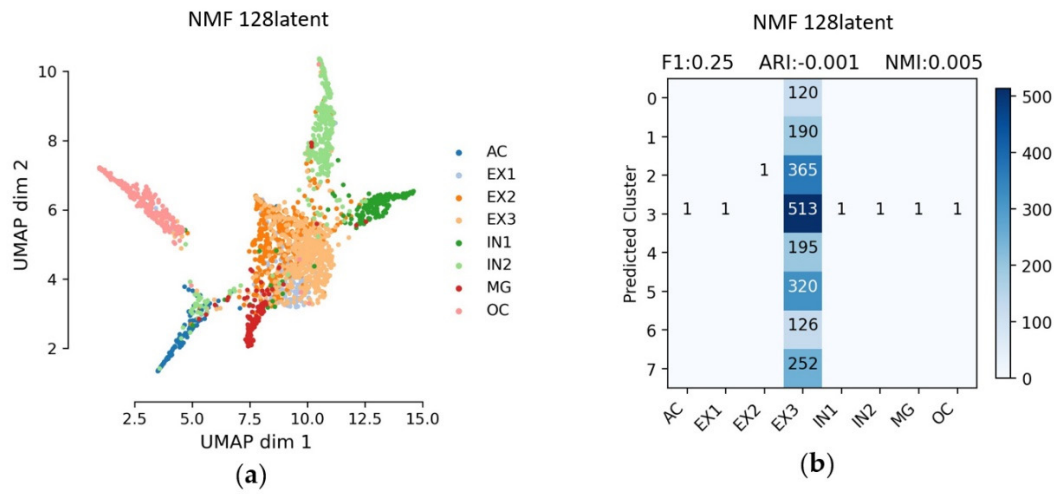

**Figure S30.** Feature embedding and clustering of NMF under different 128 latent space. Clustering accuracy was shown in evaluation matrices between cluster assignments predicted by K-means and the reference cell types. The blue colorbar refers to the number of cells; (a) UMAP visualization of the extracted features from NMF with 128 latent features; (b) Evaluation matrices with 128 latent features.

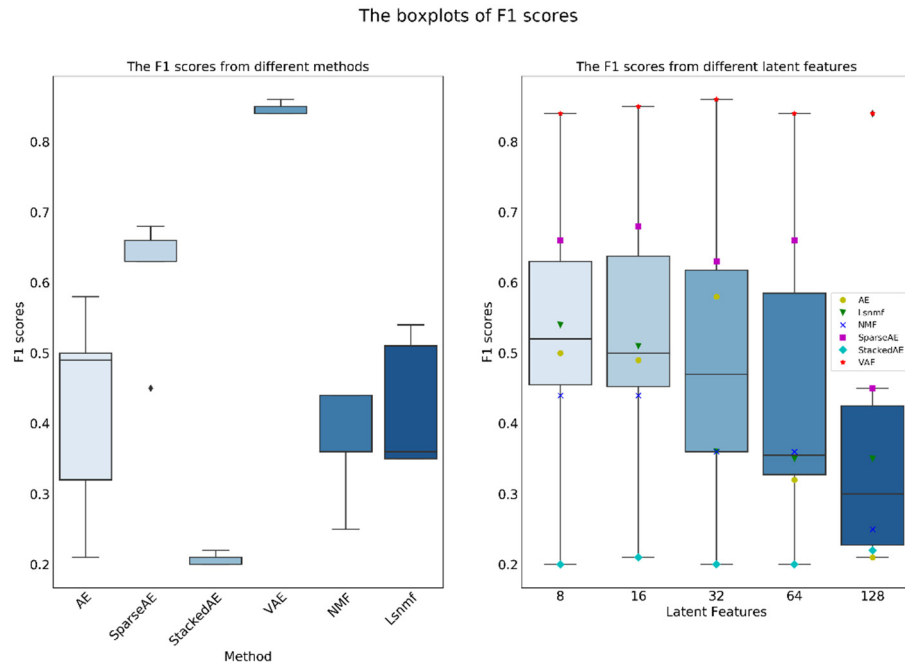

**Figure S31.** The boxplots of F1 scores generated from different methods and latent features.

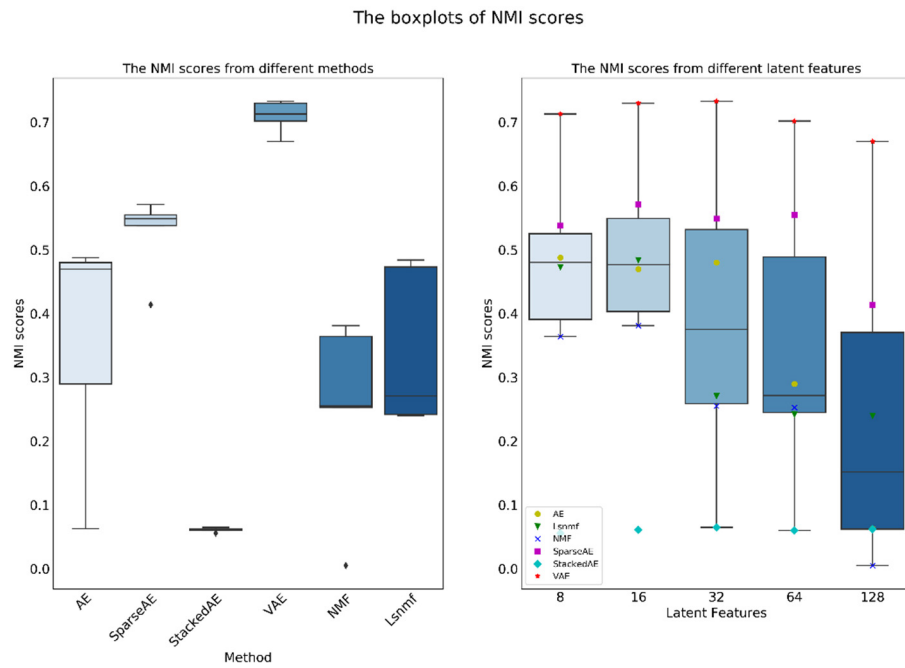

**Figure S32.** The boxplots of NMI scores generated from different methods and latent features.

**Table S1.** The clustering performance using General autoencoder with different dimension of latent features.

| Latent feature dimension | F1 score | ARI   | NMI   | Silhouette_score |
|--------------------------|----------|-------|-------|------------------|
| 8                        | 0.500    | 0.353 | 0.488 | 0.249            |
| 16                       | 0.490    | 0.352 | 0.470 | 0.238            |
| 32                       | 0.580    | 0.387 | 0.480 | 0.076            |
| 64                       | 0.320    | 0.140 | 0.290 | 0.111            |
| 128                      | 0.210    | 0.017 | 0.063 | 0.357            |

**Table S2.** The clustering performance using SparseAE with different dimension of latent features.

| Latent feature dimension | F1 score | ARI   | NMI   | Silhouette_score |
|--------------------------|----------|-------|-------|------------------|
| 8                        | 0.660    | 0.391 | 0.538 | 0.162            |
| 16                       | 0.680    | 0.473 | 0.571 | 0.111            |
| 32                       | 0.630    | 0.453 | 0.549 | 0.061            |
| 64                       | 0.660    | 0.452 | 0.555 | 0.025            |
| 128                      | 0.450    | 0.277 | 0.414 | 0.069            |

**Table S3.** The clustering performance using StackedAE with different dimension of latent features.

| Latent feature dimension | F1 score | ARI   | NMI   | Silhouette_score |
|--------------------------|----------|-------|-------|------------------|
| 8                        | 0.200    | 0.020 | 0.056 | 0.340            |
| 16                       | 0.210    | 0.021 | 0.061 | 0.134            |
| 32                       | 0.200    | 0.021 | 0.065 | 0.087            |
| 64                       | 0.200    | 0.019 | 0.060 | 0.051            |
| 128                      | 0.220    | 0.020 | 0.062 | 0.023            |

**Table S4.** The clustering performance using VAE with different dimension of latent features.

| Latent feature dimension | F1 score | ARI   | NMI   | Silhouette_score |
|--------------------------|----------|-------|-------|------------------|
| 8                        | 0.840    | 0.657 | 0.713 | 0.260            |
| 16                       | 0.850    | 0.677 | 0.730 | 0.152            |
| 32                       | 0.860    | 0.686 | 0.733 | 0.078            |
| 64                       | 0.840    | 0.643 | 0.702 | 0.058            |
| 128                      | 0.840    | 0.643 | 0.670 | 0.030            |

**Table S5.** The clustering performance using Lsnmf with different dimension of latent features.

| <b>Latent feature dimension</b> | <b>F1 score</b> | <b>ARI</b> | <b>NMI</b> | <b>Silhouette_score</b> |
|---------------------------------|-----------------|------------|------------|-------------------------|
| 8                               | 0.540           | 0.302      | 0.473      | 0.288                   |
| 16                              | 0.510           | 0.283      | 0.484      | 0.210                   |
| 32                              | 0.360           | 0.092      | 0.271      | 0.084                   |
| 64                              | 0.350           | 0.077      | 0.242      | 0.065                   |
| 128                             | 0.350           | 0.076      | 0.240      | 0.035                   |

**Table S6.** The clustering performance using NMF with different dimension of latent features.

| <b>Latent feature dimension</b> | <b>F1 score</b> | <b>ARI</b> | <b>NMI</b> | <b>Silhouette_score</b> |
|---------------------------------|-----------------|------------|------------|-------------------------|
| 8                               | 0.440           | 0.154      | 0.364      | 0.364                   |
| 16                              | 0.440           | 0.133      | 0.381      | 0.345                   |
| 32                              | 0.360           | 0.082      | 0.255      | 0.202                   |
| 64                              | 0.360           | 0.082      | 0.253      | 0.084                   |
| 128                             | 0.250           | 0.001      | 0.005      | 0.821                   |
